# Supplementary material for: A next-generation intranasal trivalent MMS vaccine induces durable and broad protection against SARS-CoV-2 variants of concern
Source: PubMed Central journal article supplement — Proc Natl Acad Sci U S A. 2023 Oct 5;120(41):e2220403120. doi: 10.1073/pnas.2220403120 (PMC10576135; doi:10.1073/pnas.2220403120), 2023-10-05
Supplement: pnas.2220403120.sapp.pdf [file pnas.2220403120.sapp.pdf]

## Supplementary Information (SI) Appendix for

### A next-generation intranasal trivalent MMS vaccine induces durable and broad protection against SARS-CoV-2 variants of concern

Jiayu Xu<sup>a,1</sup>, Yuexiu Zhang<sup>a,1</sup>, Panke Qu<sup>a,2</sup>, Mohamed M. Shamseldin<sup>b,c,2</sup>, Sung J. Yoo<sup>a,2</sup>, Jack Misny<sup>d,2</sup>, Ilada Thongpan<sup>d</sup>, Mahesh KC<sup>d</sup>, Jesse M. Hall<sup>b</sup>, John P. Evans<sup>a</sup>, Mostafa Eltobgy<sup>b</sup>, Mijia Lu<sup>a</sup>, Chengjin Ye<sup>e</sup>, Michelle Chamblee<sup>a</sup>, Xueya Liang<sup>a</sup>, Luis Martinez-Sobrido<sup>e</sup>, Amal O Amer<sup>b,f</sup>, Jacob S Yount<sup>b,f</sup>, Prosper N Boyaka<sup>a,f</sup>, Mark E. Peeples<sup>d, f, g</sup>, Shan-Lu Liu<sup>a,b,f,h</sup>, Purnima Dubey<sup>b,f</sup>, Jianrong Li<sup>a,f, 3</sup>

<sup>a</sup>Department of Veterinary Biosciences, The Ohio State University, Columbus, OH 43210

<sup>b</sup>Department of Microbial Infection and Immunity, College of Medicine, The Ohio State University, Columbus, OH 43210

<sup>c</sup>Department of Microbiology and Immunology, Faculty of Pharmacy, Helwan University, Ain Helwan, Helwan, 11795, Egypt

<sup>d</sup>Center for Vaccines and Immunity, Abigail Wexner Research Institute at Nationwide Children's Hospital, Columbus, OH 43205

<sup>e</sup> Department of Disease Intervention and Prevention, Texas Biomedical Research Institute, San Antonio, TX, USA 78227

<sup>f</sup>Department of Pediatrics, College of Medicine, The Ohio State University, Columbus, OH 43210

<sup>g</sup>Infectious Disease Institute, The Ohio State University, Columbus, OH 43210

<sup>h</sup>Center for Retrovirus Research, The Ohio State University, Columbus, OH 43210

<sup>1</sup>J.X. and Y. Z. contributed equally to this work. <sup>2</sup>P.Q., M.M.S., S.J.Y., and J.M. contributed equally to this work.

<sup>3</sup>Corresponding author  
Department of Veterinary Biosciences  
College of Veterinary Medicine  
The Ohio State University  
1925 Coffey Road  
Columbus, OH 43210  
Phone: (614) 688-2064; Email : [li.926@osu.edu](mailto:li.926@osu.edu)

#### This PDF file includes:

Supplementary Materials and Methods  
Figures S1 to S11  
Additional discussion  
SI References

## Supplementary Materials and Methods

42

43

44 **Cell culture.** Vero CCL81 cells (African green monkey, ATCC no. CCL81), HEp-2 cells (ATCC  
45 no. CCL-23), Vero-TMPRSS2 cells (BEI, NR-54970), and HEK293T-ACE2 cells (BEI, NR-  
46 52511) were grown in Dulbecco's modified Eagle's medium (DMEM; Life Technologies)  
47 supplemented with 10% fetal bovine serum (FBS). FreeStyle293F cells (Thermo Fisher) were  
48 grown in protein-free medium in suspension culture.

49

50 **Animals.** Specific-pathogen-free (SPF) interferon-alpha receptor 1 knockout (IFNAR1<sup>-/-</sup>) mice  
51 were purchased from Jackson Laboratories (Bar Harbor, ME). 4-6-week-old SPF golden Syrian  
52 hamsters were purchased from Envigo (Indianapolis, IN).

53

54 **SARS-CoV-2 stocks.** The SARS-CoV-2 USA-WA1/2020 natural isolate (SARS-CoV-2 WA1,  
55 NR-52281) was obtained from BEI Resources. The SARS-CoV-2 WA1 was originally isolated  
56 from an oropharyngeal swab from a patient with respiratory illness in January 2020 in Washington,  
57 USA. SARS-CoV-2 Delta (B.1.617.2) variant was originally isolated in the US and obtained from  
58 BEI Resources (NR-55671). SARS-CoV-2 Omicron BA.1 were kindly provided by Dr. Luis  
59 Martinez-Sobrido. All viruses were amplified and titrated on Vero-TMPRSS2 cells to prevent the  
60 selection of SARS-CoV-2 viruses lacking their furin cleavage site between spike 1 (S1) and S2.  
61 All experiments with SARS-CoV-2 virus were performed in a BSL3 facility.

62

63 **Design of prefusion spike with 6 prolines (preS-6P).** The design of preS-6P of Delta and

64 Omicron BA.1 variants is the same as the SARS-CoV-2 WA1 preS-6P (1). The six amino acids  
65 (K986, V987, F817, A892, A899, and A942) in the S2 portion of the S head region replaced with  
66 prolines (6P), the furin cleavage site deleted to prevent S1–S2 cleavage, and its C-terminal  
67 transmembrane/cytoplasmic tail domain is replaced with a T4 fibrin self-trimerizing domain.

68

69 **Rapid assembly of the full-length genomic cDNA of mumps virus (MuV) and measles virus**  
70 **(MeV) using a yeast-based recombination system.** The full-length genomic cDNA of MuV Jeryl  
71 Lynn (JL1) vaccine strain was synthesized by five overlapping DNA fragments and assembled into  
72 the pYES2 vector (2-4). The pYES2 vector contains a yeast replication origin, a T7 RNA  
73 polymerase promoter positioned before the full-length MuV genome cDNA, which was followed  
74 by a hepatitis delta virus ribozyme (HDVRz) and a T7 terminator sequences. The full-length cDNA  
75 clone of MuV-JL1 was assembled using 6 overlapping fragments and an additional 7th fragment  
76 of preS-6P (Delta variant) by using a yeast recombination system. Briefly, 100 ng of pYES2 vector  
77 was mixed with 100 ng of each MuV and preS-6P DNA fragment in a PEG/LiAc solution, and the  
78 ligation products were transformed into MaV 203 competent yeast cells by heat-shock and plated  
79 on SD/Ura<sup>-</sup> agar plates. The plates were incubated at 30°C for 3 days. Individual yeast colonies  
80 were picked and grown in SD/Ura<sup>-</sup> broth at 30°C overnight. DNA was extracted from yeasts using  
81 Qiagen mini-prep kit. The connecting regions between fragments of the plasmids were amplified  
82 by PCR and sequenced, and the positive plasmids were transformed into TOP10 *E. Coli.* competent  
83 cells. Subsequently, plasmid DNA was extracted from bacterial culture and verified by Hind III  
84 restriction enzyme digestion, PCR analysis, and then sequenced to confirm that no additional  
85 mutations had been introduced during the assembly. The final plasmid was designated as pMuV-  
86 JL1-Delta-preS-6P.

87

88 Using the same method, the full-length cDNA clone of Edmonston strain of MeV vaccine was  
89 constructed using six overlapping fragments and an additional 7th fragment of preS-6P (Omicron  
90 BA.1) by using yeast recombination system (2-4), the plasmid was designated as pMeV-BA.1-  
91 preS-6P. Primers used for amplification of MeV and MuV cDNA fragments were listed in our  
92 previous publications (2, 4).

93

94 **Recovery of rMuV-JL1-Delta-preS-6P and rMeV-BA.1-preS-6P.** Recovery of rMeV-BA.1-  
95 preS-6P and rMuV-JL1-Delta-preS-6P from the infectious clone was carried out as described  
96 previously (2-4). For the rMuV-JL1-Delta-preS-6P recovery, a plasmid encoding the full-length  
97 genome of MuV JL1 strain with the preS-6P (Delta) gene inserted and support plasmids encoding  
98 the MuV-JL1 genome-associated ribonucleocapsid complex (pN, pP, and pL) were co-transfected  
99 into HEP-2 cells infected with a recombinant modified vaccinia Ankara virus (MVA-T7)  
100 expressing T7 RNA polymerase (kindly provided by Dr. Bernard Moss) at an multiplicity of  
101 infection (MOI) of 10 (5). For the rMeV-BA.1-preS-6P recovery, a plasmid encoding the full-  
102 length genome of MeV strain with the preS-6P (Omicron BA.1) gene inserted and support plasmids  
103 (pN, pP, and pL) were co-transfected into HEP-2 infected with MVA-T7 at an MOI of 10. Four-  
104 day later, the transfected cells were scraped off the plates and co-cultured with fresh Vero CCL81  
105 cells. After 4-5 days, cells were harvested and used for the next passage to further amplification of  
106 the recovered recombinant viruses. Subsequently, the recovered viruses were plaque purified.  
107 Individual plaques were isolated, and seed stocks were amplified in Vero CCL81 cells. Seed stocks  
108 were passed 2-3 times in Vero CCL81 cells. Large stock of virus was grown in 10 T150 flask,  
109 purified, and viral titers were determined by plaque assay in Vero CCL81 cells.

110

111 **RT-PCR and sequencing.** Viral RNA was extracted from rMeV-BA.1-preS-6P and rMuV-JL1-  
112 Delta-preS-6P stocks with a RNeasy minikit (Qiagen, Valencia, CA) according to the  
113 manufacturer's instructions. SARS-CoV-2 preS-6P gene, MuV, or MeV DNA fragments were  
114 amplified by a One Step RT-PCR kit (Qiagen). The amplified DNA products were purified in 1%  
115 agarose gel electrophoresis and sequenced to confirm that preS-6P was inserted into the MuV or  
116 MeV genome and that no additional mutations were introduced during virus recovery and  
117 passages.

118

119 **MeV or MuV-JL1 growth curves.** Vero CCL81 cells were seeded in 12-well-plates. After  
120 overnight incubation, confluent Vero CCL81 cells were infected with individual virus at a MOI of  
121 0.1. After 1 h of adsorption in a rocker at 37°C incubator, the inoculum was removed, the cells  
122 were washed two times with fresh DMEM, and DMEM with 2% FBS was added. After that, the  
123 infected cells were incubated at 37°C. At the indicated time points, cell culture supernatant was  
124 harvested, and virus titers were determined by plaque assay in Vero CCL81 cells.

125

126 **Plaque assays.** For MuV and MeV plaque assay, Vero CCL81 cells were seeded in 12-well plates.  
127 After overnight incubation at 37°C, confluent monolayer cells were infected with 10-fold serial  
128 dilutions of virus stock of MuV or MeV. After adsorption for 1 h at 37°C, cells were overlaid with  
129 1 ml of DMEM containing 0.25% (w/v) low-melting agarose, 0.12% (v/v) NaHCO<sub>3</sub>, 2% (v/v)  
130 FBS, 25mM HEPES, 2mM L-Glutamine, 100µg/ml of streptomycin, and 100U/ml penicillin. The  
131 plates were incubated at 37°C for 4 days, and cells were fixed with 4% paraformaldehyde for 1 h.

132 After fixation, the overlay was discarded, and viral plaques were visualized by staining with 0.05%  
133 (v/v) crystal violet. The protocol for SARS-CoV-2 plaque assay was similar to that of MuV and  
134 MeV except that the assay was performed on Vero TMPRSS2 cells and the incubation time was 2  
135 days.

136

137 **Detection of SARS-CoV-2 S protein by Western blot.** Vero CCL81 cells were infected with  
138 parental rMeV or rMeV-BA.1-preS-6P, rMuV-JL1 or rMuV-JL1-Delta-preS-6P, rMuV-JL2 or  
139 rMuV-JL2-WA1-preS-6P at an MOI of 0.1. At the indicated times post-infection, supernatant was  
140 collected and cells were lysed in RIPA buffer (Abcam, ab156034) and boiled for 5 min at 100 °C.  
141 The proteins were loaded under non-reduced conditions on 12% SDS-PAGE and transferred to a  
142 Hybond enhanced chemiluminescence nitrocellulose membrane (Amersham) in a Mini Trans-Blot  
143 electrophoretic transfer cell (Bio-Rad). The membrane was incubated with rabbit anti-SARS-CoV-  
144 2 S polyclonal antibody (SinoBiological, 40150-T62-COV2) at a dilution of 1:2,000, and  $\beta$ -actin  
145 at a dilution of 1:5,000, followed by incubation with horseradish peroxidase (HRP)-labeled goat  
146 anti-rabbit and anti-mouse secondary antibody at a dilution of 1:5,000 in 5 % skim milk. The  
147 membrane was developed using an Odyssey CLx (LI-COR, Lincoln, NE).

148

149 **Virus neutralization assay.** Virus neutralization assays were performed as previously described  
150 (6). Mice or hamster sera samples were heat inactivated at 56°C for 30 min. Briefly, sera were 4-  
151 fold serially diluted in DMEM in a 96-well plate and equal amounts of SARS-CoV-2 variant  
152 pseudotyped virus was added to the diluted serum to get final dilutions of 1:40, 1:160, 1:640,  
153 1:2560, 1:10240, and no serum control. The pseudoviruses including D614G, Delta (B.1.617.2)  
154 (7), Omicron BA.1, and BA.4/5 (8) were incubated with serum 1 h at 37°C, followed by infection

155 of  $2 \times 10^4$  pre-seeded HEK293T-ACE2 cells on a 96-well polystyrene tissue culture plate (6).  
156 *Gaussia* luciferase activity in cell culture media was assayed 48 h and 72 h after infection.  
157 Luminescence was immediately measured by combining 20  $\mu$ L cell culture media with 20  $\mu$ L of  
158 *Gaussia* luciferase substrate (0.1 M Tris pH 7.4, 0.3 M sodium ascorbate, 10  $\mu$ M coelenterazine)  
159 on a BioTek Cytation5 plate reader. To ensure valid comparisons between SARS-CoV-2 variants  
160 and ancestral strains, equivalent amounts of infectious pseudoviruses were used based on the pre-  
161 determined virus titers and samples of different variants were loaded side by side in each plate.  
162 Neutralizing titer 50% (NT<sub>50</sub>) for each sample was determined by non-linear regression with least  
163 squares fit in GraphPad Prism 9 (San Diego, CA).

164

165 **Detection of SARS-CoV-2-specific serum IgG and IgA antibody by ELISA.** Serum IgG and  
166 IgA antibodies were detected by ELISA as described in our previous publication (3). Briefly,  
167 ninety-six-well plates were coated with 8  $\mu$ g/ml prefusion S protein (preS-6P) of SARS-CoV-2  
168 WA1, BA.1 or Delta (in 50 mM Na<sub>2</sub>CO<sub>3</sub> buffer, pH 9.6) at 4°C overnight. The plates were washed  
169 one time with phosphate-buffered saline containing 0.05% Tween-20 (PBST) and blocked with  
170 1% (w/v) Bovine Serum Albumin (BSA) in PBS at 4°C overnight. Each serum sample was 4-fold  
171 serially diluted in blocking buffer and added to the preS-6P protein-coated wells (100  $\mu$ l/well).  
172 The plates were incubated at room temperature for 2h, washed three times with PBST, and  
173 incubated with 100  $\mu$ l/well of 1:15,000 blocking buffer-diluted horseradish peroxidase (HRP)-  
174 conjugated secondary antibody (goat anti-mouse IgG (H+L) (Thermo Scientific, catalog no.  
175 31430) or goat anti-hamster IgG (H+L) (Invitrogen, catalog no. PA1-28823) at room temperature  
176 for 1 h. The SARS-CoV-2 S-specific IgA antibody was detected by adding HRP-conjugated anti-  
177 mouse IgA (Southern Biotech Associates Inc., Birmingham, AL) or HRP-conjugated anti-Hamster

178 IgA (Brookwoodbiomedical, Jemison, AL). The SARS-CoV-2 S-specific IgG antibody was  
179 detected by adding 100  $\mu$ l/well of SureBlue™ TMB 1-Component Microwell Peroxidase Substrate  
180 (Fisher Scientific, 50-674-93), and stopped by 100 $\mu$ l of H<sub>2</sub>SO<sub>4</sub> (2 mol/L). Optical densities at 450  
181 nm (OD<sub>450</sub>) were measured by a BioTek microplate reader. Endpoint titers were determined as the  
182 reciprocal of the highest dilution that had an OD<sub>450</sub> value 2.1-fold greater than the background  
183 level (normal control serum).

184

185 **Animal experiments:** All animals were housed within ULAR facilities of The Ohio State  
186 University under approved Institutional Laboratory Animal Care and Use Committee (IACUC)  
187 guidelines (protocol no. 2009A1060-R3 and 2020A00000053). Each inoculation group was  
188 separately housed in rodent cages under animal biosafety level 2 (ABSL-2 for MeV and MuV) or  
189 ABSL3 (for SARS-CoV-2) conditions.

190

191 **Animal experiment 1:** To compare the efficacy of the monovalent (rMeV-BA.1-preS-6P) and the  
192 trivalent vaccine (rMeV-BA.1-preS-6P, rMuV-JL1-Delta-preS-6P, and rMuV-JL2-WA1-preS-6P)  
193 in IFNAR1<sup>-/-</sup> mice. Twenty-five 4-week-old IFNAR1<sup>-/-</sup> mice (Jackson Laboratory, Bar Harbor,  
194 ME) were randomly divided into 5 groups ( $n=5$ ). Mice in groups 1-3 were immunized with  $1.5 \times 10^6$   
195 PFU (high dose) of monovalent, trivalent, or parental rMeV, rMuV-JL1, and rMuV-JL2  
196 respectively. The administration route was  $7.5 \times 10^5$  PFU in 30 $\mu$ L of DMEM for intranasal (*i.n.*)  
197 combined with  $7.5 \times 10^5$  PFU in 500 $\mu$ L of DMEM for subcutaneous (*s.c.*). Three weeks later, all  
198 mice were boosted with the same virus by the same dose and route of immunization. At weeks 2,  
199 5, and 7, blood samples were collected from each mouse from the facial vein. Serum was isolated  
200 and used to detect WA1, Delta, or BA.1 S-specific IgG and IgA antibody by ELISA, the serum at



201 week 7 was used to detect neutralization antibody against WA1-D614G, Delta, Omicron BA.1,  
202 and BA4/5 pseudotyped virus. At week 4 post booster immunization, mice in groups 1-3 were  
203 sacrificed, lung and spleens were collected for T cell assay.

204

205 Mice in groups 4-5 were immunized with  $5 \times 10^5$  PFU (low dose) of monovalent rMeV-BA.1-  
206 preS-6P and trivalent (half for intranasal and half for subcutaneous). Three weeks later, all mice  
207 were boosted with the same virus by the same dose and route of immunization. At weeks 2, 5, 7,  
208 11, 13, and 16 weeks, blood samples were collected from each mouse from the facial vein. Serum  
209 was isolated and used to detect WA1, Delta, or BA.1 S-specific IgG antibody by ELISA.

210

211 **Animal experiment 2:** To determine the efficacy of the monovalent (rMeV-BA.1-preS-6P) and  
212 the trivalent vaccine in golden Syrian hamsters. Fifty 4-week-old female SPF golden Syrian  
213 hamsters were randomly divided into 4 groups. Hamster in Group 1 ( $n=15$ ) were inoculated with  
214  $1.5 \times 10^6$  PFU rMeV-BA.1-preS-6P. Hamster in Group 2 ( $n=15$ ) were inoculated with  $1.5 \times 10^6$  PFU  
215 trivalent vaccine. Hamster in Group 3 ( $n=15$ ) and Group 4 ( $n=5$ ) were immunized with  $1.5 \times 10^6$   
216 PFU parental MMM vector, or the same volume of DMEM, respectively. The administration route  
217 was  $7.5 \times 10^5$  PFU in  $30 \mu\text{L}$  of DMEM for intranasal (*i.n.*) combined with  $7.5 \times 10^5$  PFU in  $500 \mu\text{L}$  of  
218 DMEM for subcutaneous (*s.c.*). Three weeks later, all hamsters were boosted with the same virus  
219 by the same dose and route of immunization. At weeks 2, 5, and 7, blood samples were collected  
220 from each hamster via retro-orbital plexus, serum was isolated, and S-specific antibody against  
221 WA1, Delta, and BA.1 was detected by ELISA. The serum at week 7 was isolated to detect  
222 neutralization antibody against WA1-D614G, Delta, Omicron BA.1, and BA4/5 pseudotyped  
223 virus.

224

225 At week 4 post-booster immunization, hamsters in groups 1-3 were transferred into the BSL3  
226 facility and each group were divided into 3 subgroups ( $n=5$ ) and challenged with  $2 \times 10^4$  PFU of  
227 SARS-CoV-2 USA-WA1/2020 strain WA1,  $2 \times 10^4$  PFU Delta, and  $7 \times 10^5$  PFU Omicron BA.1. We  
228 slightly adjusted the challenge protocol for Omicron BA.1 because previous studies suggested that  
229 hamsters are less susceptible to Omicron BA.1 infection probably due to the alteration of its  
230 receptor binding affinity to hamster ACE2 (9). To overcome this problem, hamsters were  
231 intranasally infected with  $10^8$  PFU of Ad5-hACE2 5 days prior to being challenged with BA.1  
232 virus. Hamsters in group 4 were inoculated with DMEM and served as unimmunized unchallenged  
233 controls and maintained in the BSL2 facility. After SARS-CoV-2 challenge, clinical signs and body  
234 weight of each hamster were monitored daily. At day 4 (WA1 and Delta) or day 3 (Omicron BA.1)  
235 post-challenge, all hamsters in each group were euthanized, and left lung and nasal turbinate were  
236 collected for detection of infectious SARS-CoV-2 by plaque assay. In addition, the right lung was  
237 preserved in 4% (v/v) phosphate-buffered formaldehyde for histology.

238

239 **Animal experiment 3:** To determine whether intranasal immunization alone can provide  
240 protection against SARS-CoV-2 challenge. Thirty five 4-week-old female SPF golden Syrian  
241 hamsters were randomly divided into 7 groups ( $n=5$ ). Hamsters in groups 1-3 were inoculated with  
242  $1.5 \times 10^6$  PFU trivalent vaccine by intranasal route. Hamsters in groups 4-6 were immunized with  
243  $1.5 \times 10^6$  PFU parental MMM vector by intranasal route. Hamsters in group 7 were immunized  
244 with the same volume of DMEM by intranasal route. Two weeks later, all hamsters were boosted  
245 with the same virus by the same dose and route of immunization. At weeks 2, 4, and 6, blood  
246 samples were collected from each hamster via retro-orbital plexus, serum was isolated, and S-

247 specific IgG and IgA antibodies against WA1, Delta, and BA.1 were detected by ELISA. At week  
248 5 post-booster immunization, hamsters in groups 1-6 were transferred into the BSL3 facility.  
249 Hamsters in groups 1 and 4, groups 2 and 5, and groups 3 and 6 were challenged with  $2 \times 10^4$  PFU  
250 SARS-CoV-2 USA-WA1/2020 strain WA1,  $2 \times 10^4$  PFU Delta, and  $7 \times 10^5$  PFU Omicron BA.1,  
251 respectively. For SARS-CoV-2 Omicron BA.1 infection, hamsters were intranasally infected with  
252  $10^8$  PFU of Ad5-hACE2 5 days prior to being challenged with BA.1 virus. Hamsters in group 7  
253 were inoculated with DMEM and served as unimmunized unchallenged controls and maintained  
254 in the BSL2 facility. After SARS-CoV-2 challenge, clinical signs and body weight of each hamster  
255 were monitored daily. At day 4 (WA1 and Delta) or day 3 (Omicron BA.1) post-challenge, all  
256 hamsters in each group were euthanized, and lung and nasal turbinate were collected for detection  
257 of infectious SARS-CoV-2 by plaque assay.

258

259 **Animal experiment 4:** To compare the efficacy of the immunization route. Twenty 4-6-week-old  
260 SPF female IFNAR1<sup>-/-</sup> mice (Jackson Laboratory, Bar Harbor, ME) were randomly divided into 2  
261 groups ( $n=10$ ). Mice in group 1 and group 2 were immunized intranasally or subcutaneously with  
262  $1.2 \times 10^6$  PFU of trivalent vaccine, respectively. Two week later, all mice were boosted with the  
263 same virus at same dose and route. At weeks 2, 4, and 6, blood samples were collected from each  
264 mouse by facial vein bleeding, serum isolated, and WA1, Delta, or BA.1 S-specific IgG and IgA  
265 antibodies were detected by ELISA. At weeks 6, mice were euthanized. Lung bronchoalveolar  
266 lavage (BAL) were collected, WA1, Delta, or BA.1 S- specific IgG or IgA in BAL were measured  
267 by ELISA.

268

269 **Animal experiment 5:** To determine whether rMeV and rMuV vectors interfere with S-specific

270 antibody induced by rMuV-JL1-Delta-preS-6P. Twenty 4-week-old IFNAR1<sup>-/-</sup> mice (Jackson  
271 Laboratory, Bar Harbor, ME) were randomly divided into 4 groups ( $n=5$ ). Mice in group 1 were  
272 immunized with  $1.5 \times 10^6$  PFU of trivalent vaccine (a mixture of  $5 \times 10^5$  PFU of rMeV-BA.1-preS-  
273 6P,  $5 \times 10^5$  PFU of rMuV-JL1-Delta-preS-6P, and  $5 \times 10^5$  PFU of rMuV-JL2-WA1-preS-6P) by  
274 intranasal route. Mice in group 2 were immunized with  $1.5 \times 10^6$  PFU of rMuV-JL1-Delta-preS-  
275 6P by intranasal route. Mice in group 3 were immunized with  $5 \times 10^5$  PFU of rMuV-JL1-Delta-  
276 preS-6P by intranasal route. Mice in group 4 were immunized with  $1.5 \times 10^6$  PFU of a mixture of  
277 rMuV-JL1-Delta-preS-6P, rMuV-JL2, and rMeV ( $5 \times 10^5$  PFU of rMuV-JL1-Delta-preS-6P,  $5 \times 10^5$   
278 PFU of rMuV-JL2, and  $5 \times 10^5$  PFU of rMeV) by intranasal route. Two week later, all mice were  
279 boosted with the same virus by the same dose and route of immunization. At weeks 2, 4, and 6,  
280 blood samples were collected from each mouse from the facial vein. Serum was isolated and used  
281 to detect WA1, Delta, or BA.1 S-specific IgG antibody by ELISA.

282

283 **Recombinant antigen production.** The plasmid pCAGGS encoding the SARS-CoV-2 WA1,  
284 Delta, and BA.1 stabilized soluble preS-6P protein (amino acids 1-1273) was transfected into  
285 FreeStyle293F cells to produce the preS-6P protein. After transfection, cell culture supernatants  
286 were collected and the secreted preS-6P protein was purified via affinity chromatography as  
287 described (1). The purified proteins were analyzed by SDS-PAGE and visualized by Coomassie  
288 blue staining. Protein concentration was measured using Bradford reagent (Sigma Chemical Co.,  
289 St. Louis, MO).

290

291 **Analysis of resident and circulating T cells in the lungs.** IFNAR1<sup>-/-</sup> mice immunized with  
292  $1.5 \times 10^6$  PFU (high dose) of monovalent, trivalent, or parental rMeV, rMuV-JL1, and rMuV-JL2

293 were terminated at week 7. To discriminate the circulating T cells from the resident T cells in the  
294 lungs, anti-CD45-PE (Clone 30-F11, BD Biosciences) (3  $\mu\text{g}$  in 100  $\mu\text{L}$  sterile PBS) was retro-  
295 orbitally injected into mice 10 min prior to euthanasia. The circulating lymphocytes were labeled  
296 by anti-CD45-PE antibody whereas resident lymphocytes are protected from labeling. Peripheral  
297 blood was collected at time of sacrifice and analyzed by flow cytometry to confirm that >90% of  
298 circulating lymphocytes were CD45-PE<sup>+</sup> and ensure that the tissue resident CD45- cells in the  
299 tissues are tissue resident.

300

301 At the termination, lungs were isolated and homogenized into a single cell suspension using the  
302 gentleMACS tissue dissociator and mouse lung dissociation kit (Miltenyi Biotec Ref. 130-095-  
303 927). The cell suspensions were filtered using 40  $\mu\text{m}$  filter and red blood cells were removed  
304 using ACK lysis buffer. Cell suspensions were processed in the dark to minimize photobleaching  
305 of the CD45-PE signal. After that, cells were resuspended in T cell media (RPMI 1640  
306 supplemented with 0.1% gentamicin antibiotic, 10% HI-FBS, Glutamax, and  $5 \times 10^{-5}$  M  $\beta$ -ME) and  
307 incubated for 4-5 h at 37°C with protein transport inhibitor cocktail (eBioscience). Subsequently,  
308 cells were stimulated with PMA (50 ng/ml) /Ionomycin (500 ng/ml) or with two S peptide pools  
309 covering the C- and N-terminus of SARS-CoV-2 S protein (PepTivator SARS-CoV-2 Prot\_S1 and  
310 PepTivator SARS-CoV-2 Prot\_S+) (Miltenyi Biotec Ref. 130-126-701& 130-126-700). The final  
311 concentration of each peptide is 1  $\mu\text{g}/\text{ml}$ . For negative controls, cells incubated with DMSO alone.  
312 The peptide stimulation time should not affect CD45-PE staining. This method has been validated  
313 by Anderson KG et al (2014) (10).

314

315 After stimulation, cells were washed with cold PBS followed by staining with LIVE/DEAD

316 Zombie NIR Fixable Viability dye (Biolegend Cat. 423105) for 30 min at 4°C. Cells were then  
317 washed twice with PBS supplemented with 1% HI-FBS (1% FBS) (FACS buffer) and resuspended  
318 in Fc Block (clone 93) (eBioscience Ref. 14-0161-86) at 4°C for 5 min before surface staining  
319 with a cocktail of the following antibodies for 20 min at 4°C: CD4 BV750 (Clone H129.19) (BD  
320 Cat. 747275), CD44 PerCP Cy5.5 (Clone IM7) (BD Cat. 560570), CD62L BV605 (Clone MEL-  
321 14) (BD Cat. 563252) and CD69 BV711 (Clone HI.2F3) (BD Cat. 740664). After two washes in  
322 FACS buffer cells were resuspended in IC fixation buffer (eBioscience Cat. 00-8222-49) and  
323 incubated for 20 min at room temperature. Then, cells were permeabilized (eBioscience Cat. 00-  
324 8333-56), followed by intracellular staining for 30 min at 4°C using a cocktail of the following  
325 antibodies: IL-17 PE CY7 (clone eBio17B7) (eBioscience Cat. 25-7177-82), IFN $\gamma$  FITC (clone  
326 XMG1.2) (eBioscience Cat. 11-7311-82), and IL-5 APC (clone TRFK5) (BD Cat. 554396). To  
327 detect the CD8<sup>+</sup> T cell population, the same panel was used with the replacement of CD4 BV750  
328 antibody with CD8 APC (clone 53-6.7) (Biolegend Cat. 100712) and probing for IFN $\gamma$  only. For  
329 negative controls, fluorescence minus one or isotype control antibodies were used. Finally, cells  
330 were washed with permeabilization buffer and resuspended in FACS buffer. Samples were  
331 collected on a Cytex Aurora flow cytometer (Cytexbio). Flow cytometer data analysis was  
332 performed using FlowJo software (version 10.8.0). The number of cells within each population  
333 was calculated by multiplying the frequency of live singlets in the population of interest by the  
334 total number of cells in each sample. Gating strategy for PMA/Ionomycin and S peptide  
335 stimulation was shown in **Fig.S2** and **Fig.S3**, respectively.

336

337 **Flow cytometry analysis of antigen-specific cytokine producing T cells in spleen.** IFNAR1<sup>-/-</sup>  
338 mice immunized with 1.5 $\times$ 10<sup>6</sup> PFU (high dose) of monovalent, trivalent, or parental rMeV, rMuV-

339 JL1, and rMuV-JL2 were terminated at week 7 for analyzing T cells in the spleen. For this purpose,  
340  $10^6$  spleen cells were stimulated with 5  $\mu\text{g}/\text{ml}$  of preS-6P protein *in vitro* for 5 days in 96-well  
341 round bottom plates. Cells were then cultured for 4 h in the presence of PMA/Ionomycin  
342 (BioLegend) and GolgiStop (BD Biosciences). Following incubation, cells were surface stained  
343 for CD3, CD4, and CD8 for 30 min at 4°C, fixed and permeabilized using the cytofix/cytoperm  
344 kit (BD Biosciences), and intracellularly stained for IFN- $\gamma$ , TNF- $\alpha$ , IL-4, IL-10, IL-17, and IL-21  
345 for 30 min at room temperature. The following mouse reactive antibodies (clone, catalog number,  
346 dilution) from BioLegend, BD Biosciences, and ThermoFisher Scientific were used for analysis  
347 of T cells: CD3-PE/Cyanine7 (145-2C11, 100319, 1:400), TNF $\alpha$ -Brilliant Violet 785 (MP6-XT22,  
348 506341, 1:400), IFN $\gamma$ -PE/Dazzle 594 (XMG1.2, 505845, 1:400), IL-4-Brilliant Violet 711 (11B11,  
349 504133, 1:100), IL-21 Alexa Fluor 647 (mhalx21, 51-7213-80, 1:100), IL-17 Alexa Fluor 488  
350 (TC11-18H10, 560221, 1:100), CD8-BUV737 (53-6.7, 612759, 1:400), CD4-BUV 496 (GK1.5,  
351 612952, 1:400), and IL-10-Brilliant Violet 510 (JES5-16E3, 563277, 1:100). The cells were  
352 analyzed with an Attune flow cytometer and data analyzed using FlowJo v10. Gating strategy was  
353 shown in **Fig.S8**.

354

355 **Determination of SARS-CoV-2 viral titer in tissues.** At day 3 or 4 after SARS-CoV-2 challenge,  
356 animals were terminated. The left lung lobe and nasal turbinate were collected and stored at -80°C.  
357 Tissues were weighed and homogenized by hand with a mortar and pestle (Golden, CO) in 1mL  
358 of sterile PBS. The presence of infectious SARS-CoV-2 was determined by plaque assay in Vero-  
359 TMPRSS2 cells.

360

361 **Histological analysis of lung tissues.** At the termination of animals, the right lung lobe was

362 preserved in phosphate-buffered 4% (v/v) formaldehyde for 14 days and then transferred out of  
363 the BSL-3 facility. Fixed lung tissues were embedded in paraffin, sectioned at 5  $\mu$ m in duplicate,  
364 deparaffinized, and rehydrated. Each section was stained with hematoxylin-eosin (H.E.) and sent  
365 to a pathologist for blind review of histological changes. Each lung section was scored based on  
366 the severity of histologic changes. Score 4 = extremely severe; score 3 = severe; score 2 =  
367 moderate; score 1 = mild; score 0 = no pathological changes.

368

369 **Statistical analysis.** Statistical analysis was performed by Student's *t*-test, one-way or two-way  
370 ANOVA multiple comparisons using GraphPad Prism software (San Diego, CA). A *P* value of  
371  $<0.05$  was considered statistically significant.

372

373

374

375

376

377

378

379

380

381

382

383

384



385

Supplementary figures 1-11

386

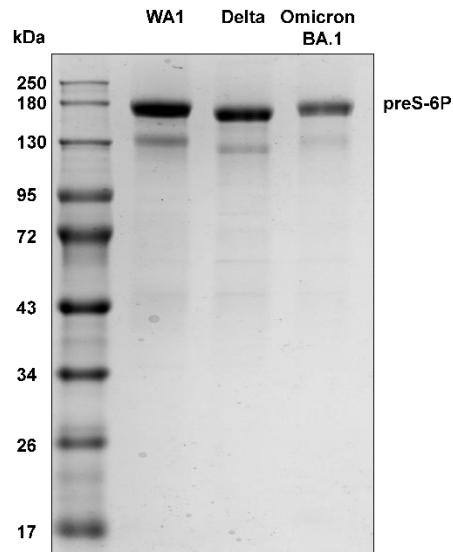

387

388 **Fig.S1. SDS-PAGE analyses for purified SARS-CoV-2 preS-6P protein.** The preS-6P of SARS-  
389 CoV-2 WA1, Delta variant, and Omicron BA.1 were purified and analyzed by SDS-PAGE  
390 followed by Coomassie blue staining.

391

392

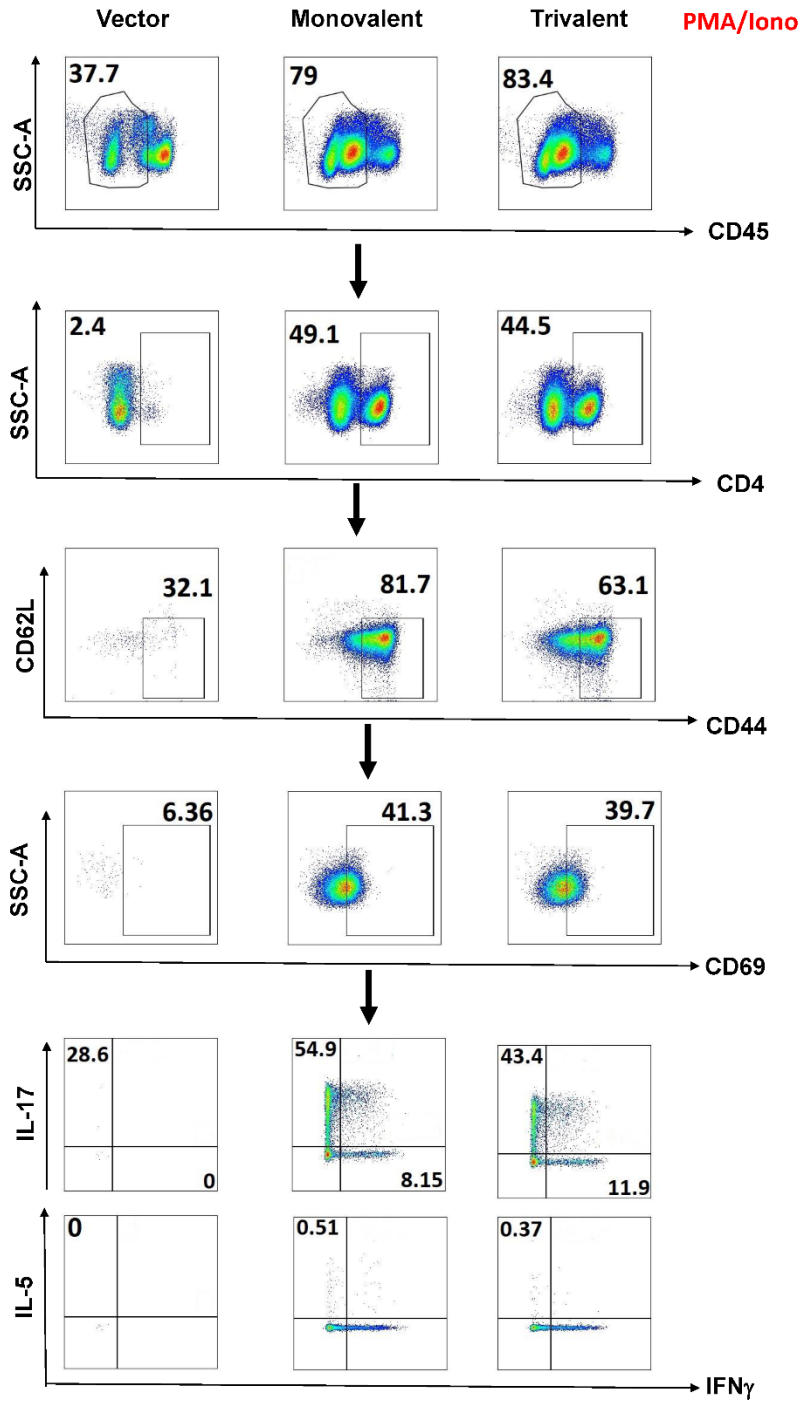

393

394

395 **Fig.S2. Gating strategy for characterization of lung-resident CD4<sup>+</sup> T cells producing**

396 **cytokines after stimulation with PMA/Ionomycin in intracellular cytokine staining (ICS)**

397 **assay.**

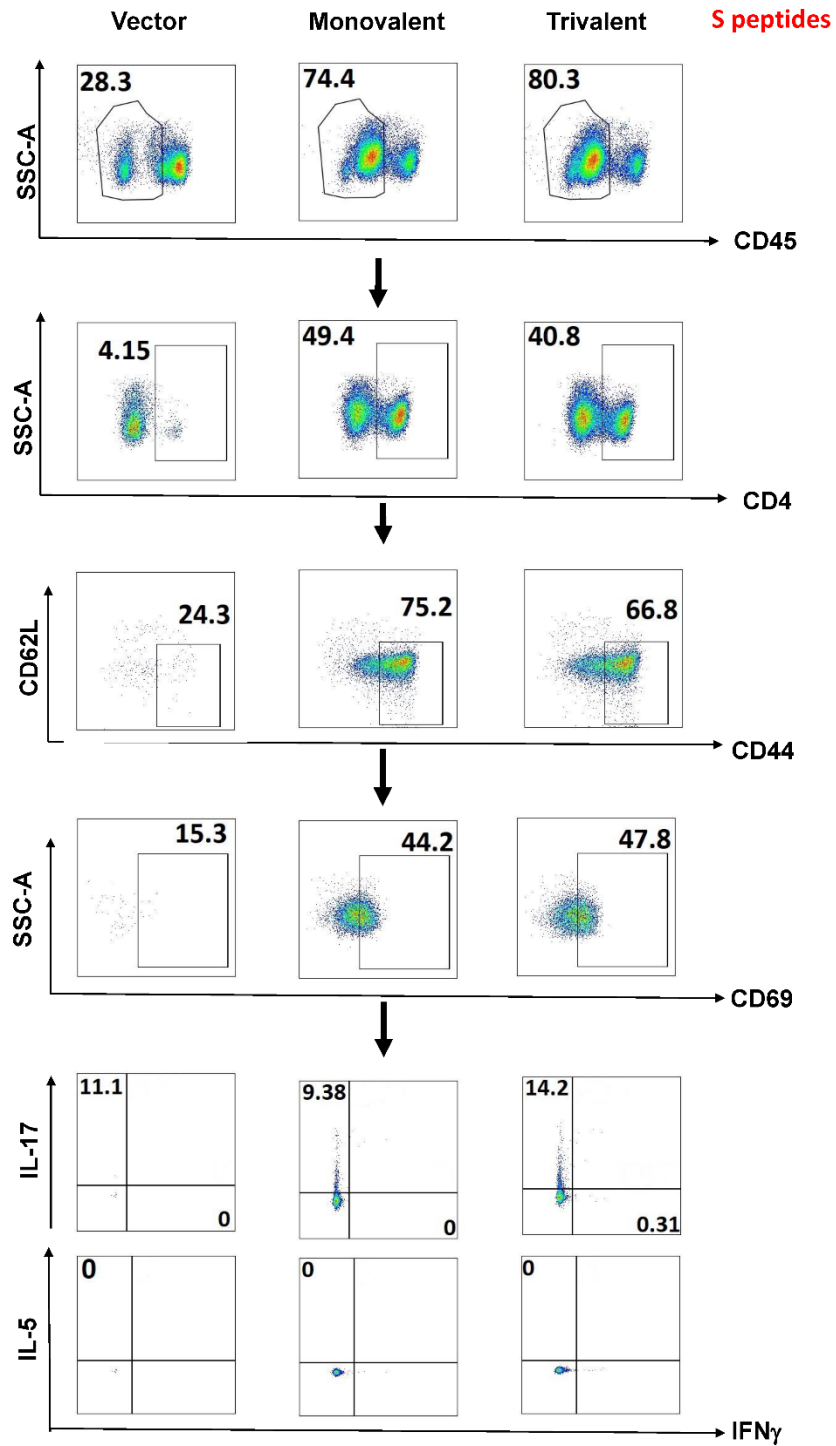

398

399 **Fig.S3. Gating strategy for characterization of S peptide-specific CD4<sup>+</sup> T cells producing**  
 400 **cytokines after stimulation with SARS-CoV-2 S peptide in intracellular cytokine staining**  
 401 **(ICS) assay.**

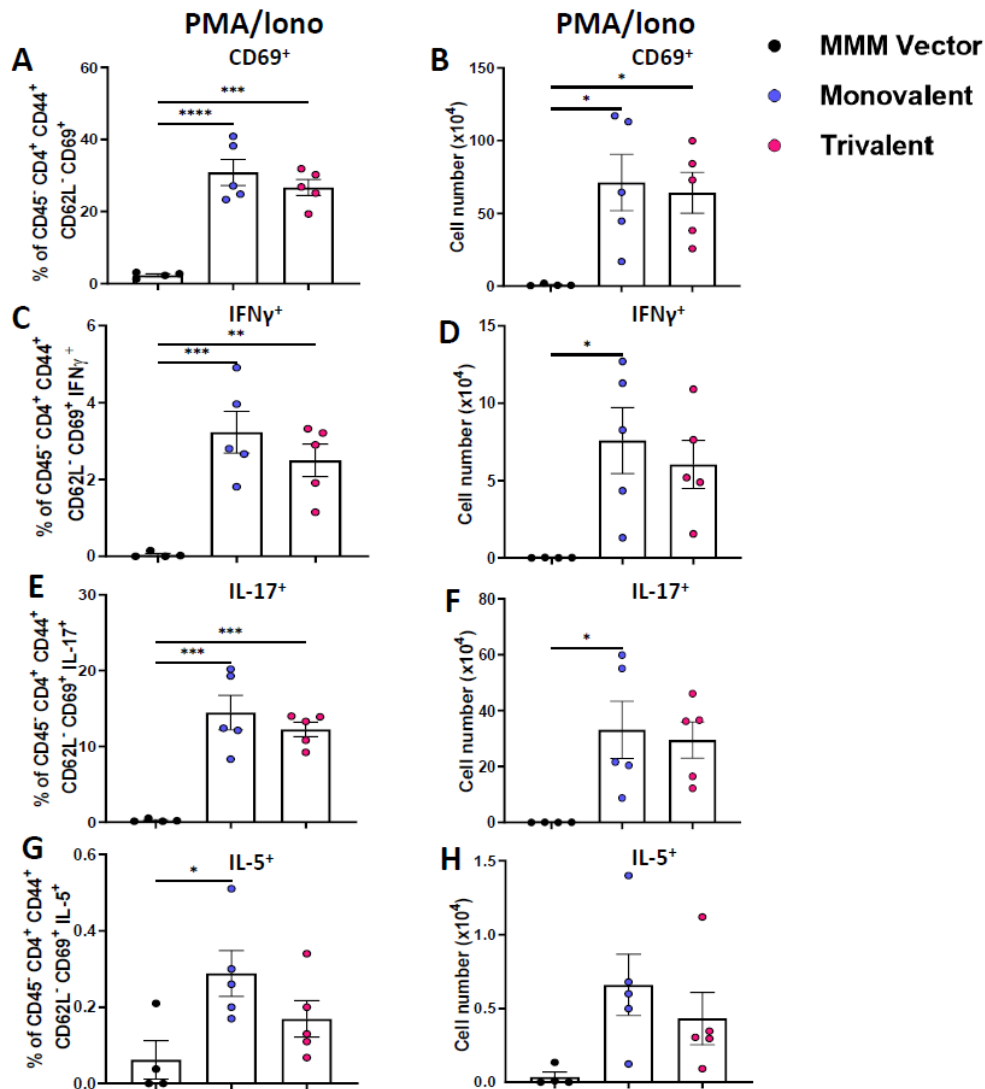

402

403

404 **Fig.S4. Monovalent and trivalent vaccines induce tissue-resident CD4<sup>+</sup> T cell immune**

405 **responses in the lungs after stimulation with PMA/Ionomycin.** Lung CD45<sup>-</sup> T cell suspensions

406 from **Fig.5** were stimulated with PMA/Ionomycin in the presence of protein transport inhibitors.

407 The percent and number of PMA/Ionomycin-stimulated CD45<sup>-</sup> CD4<sup>+</sup>CD44<sup>+</sup>CD62L<sup>-</sup>CD69<sup>+</sup> T cells

408 (A and B), IFN $\gamma$ <sup>+</sup> (C and D), IL-17<sup>+</sup> (E and F), and IL-5<sup>+</sup> (G and H) producing CD4<sup>+</sup> T cells are

409 shown. One-way ANOVA with Tukey's multiple comparisons was used to detect differences

410 among groups (\* $P < 0.05$ ; \*\* $P < 0.01$ ; \*\*\* $P < 0.001$ ; \*\*\*\* $P < 0.0001$ ).

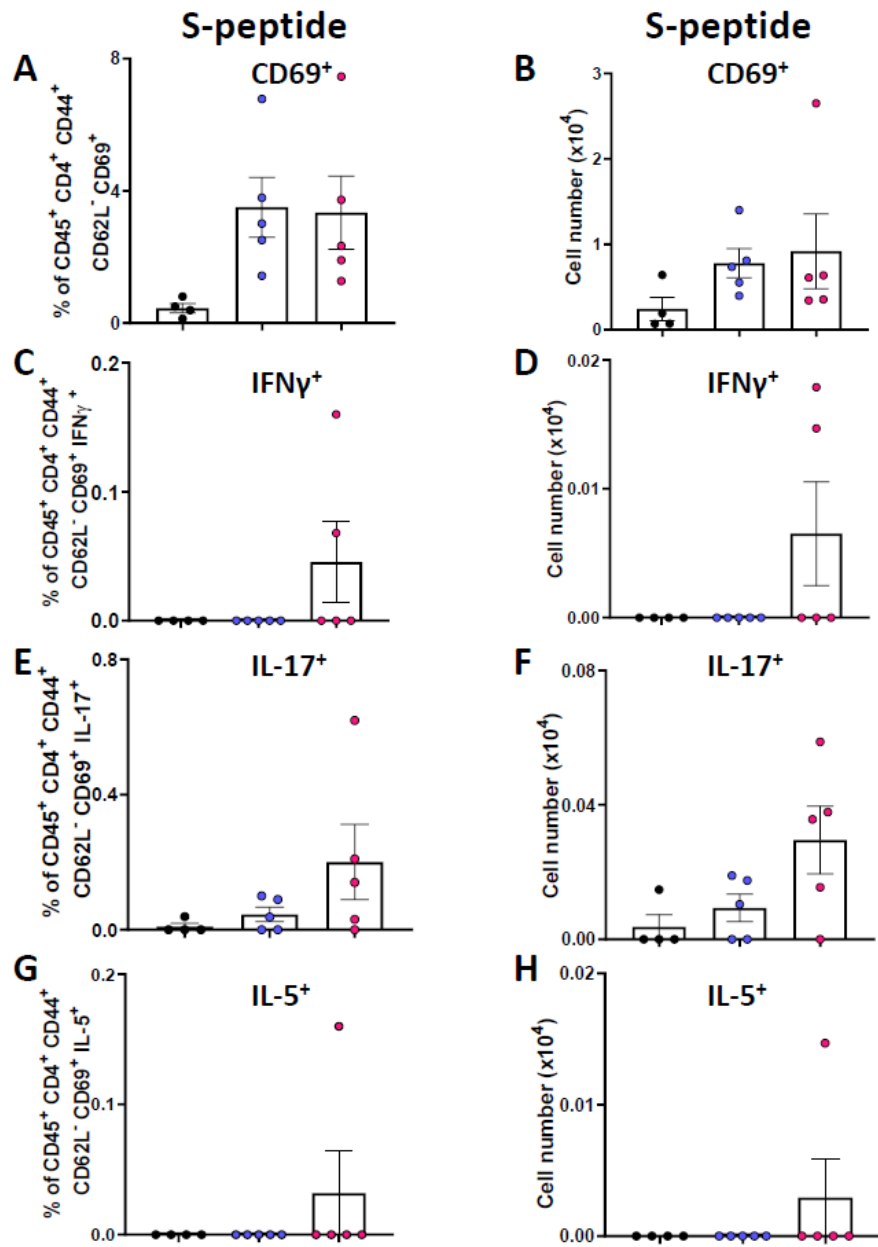

411

412

413

414

415

416

417

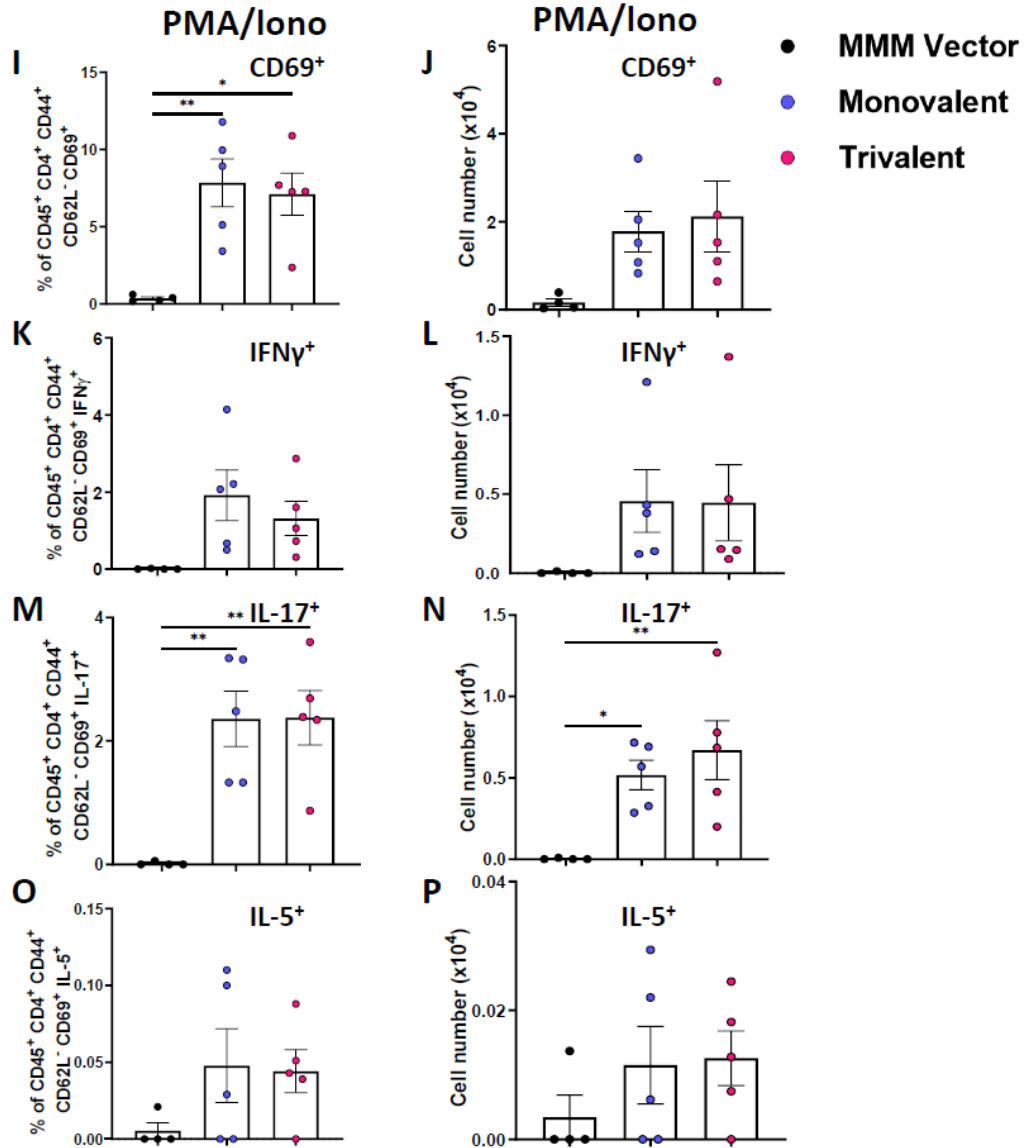

419

420

421 **Fig.S5. Monovalent and trivalent vaccines induce circulating CD4<sup>+</sup> T cell immune responses**

422 **in the lungs.** Lung CD45<sup>+</sup> T cell suspensions were stimulated with an S-specific peptide pool (A-

423 H) or PMA/Ionomycin (I-P) in the presence of protein transport inhibitors. Cells were surface

424 stained with antibodies specific for CD4 or CD8, CD62L, CD44, CD69, then fixed, permeabilized,

425 and stained with anti- IFN $\gamma$ , anti-IL-17, and anti-IL-5 for CD4<sup>+</sup> T cells. Cells were analyzed on a

426 Cytex Aurora spectral flow cytometer. The percent and number of S-specific  
427 CD45<sup>+</sup>CD4<sup>+</sup>CD44<sup>+</sup>CD62L<sup>-</sup>CD69<sup>+</sup> T cells (A and B), IFN $\gamma$ <sup>+</sup> (C and D), IL-17<sup>+</sup> (E and F), and IL-  
428 5<sup>+</sup> (G and H) producing CD4<sup>+</sup> T cells are shown in A-H. The percent and number of  
429 PMA/Ionomycin-stimulated CD45<sup>+</sup>CD4<sup>+</sup>CD44<sup>+</sup>CD62L<sup>-</sup>CD69<sup>+</sup> T cells (I and J), IFN $\gamma$ <sup>+</sup> (K and L),  
430 IL-17<sup>+</sup> (M and N), and IL-5<sup>+</sup> (O and P) producing CD4<sup>+</sup> T cells are shown in I-P. One-way ANOVA  
431 with Tukey's multiple comparisons was used to detect differences among groups (\* $P < 0.05$ ;  
432 \*\* $P < 0.01$ ; \*\*\* $P < 0.001$ ; \*\*\*\* $P < 0.0001$ ).

433

434

435

436

437

438

439

440

441

442

443

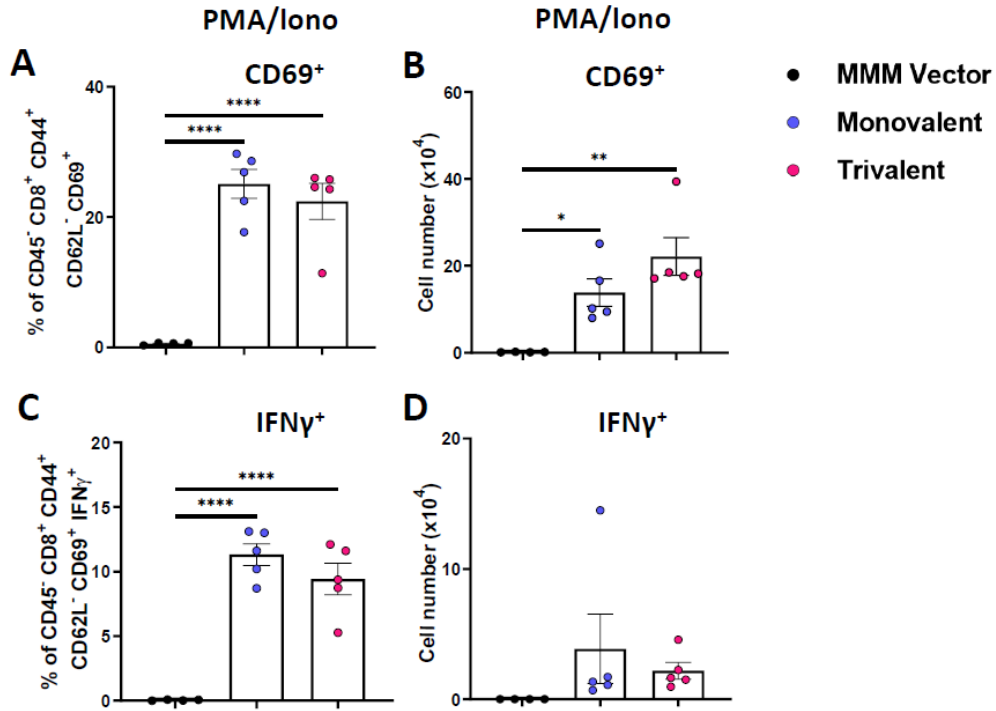

444

445

446 **Fig.S6. Monovalent and trivalent vaccines induce CD8<sup>+</sup> T cell immune responses in the lungs**

447 **after stimulation with PMA/Ionomycin.** The CD8<sup>+</sup>CD69<sup>+</sup> T cells in the lungs from **Fig.5** were

448 stimulated PMA/Ionomycin in the presence of protein transport inhibitors. The percent and number

449 of PMA/Ionomycin-stimulated-specific CD45<sup>-</sup>CD8<sup>+</sup>CD44<sup>+</sup>CD62L<sup>-</sup> CD69<sup>+</sup> T cells (A and B),

450 IFNγ<sup>+</sup>-producing CD8<sup>+</sup> T cells (C and D) are shown. One-way ANOVA with Tukey's multiple

451 comparisons was used to detect differences among groups (\**P* < 0.05; \*\*\*\**P* < 0.0001).

452

453

454

455

456

457



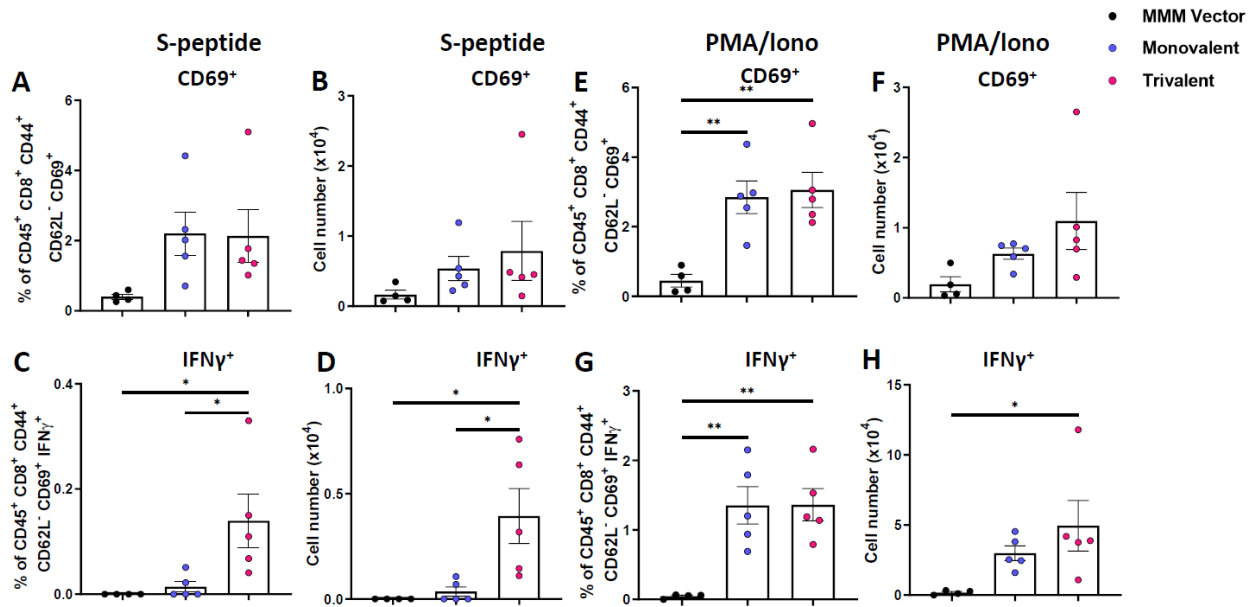

458

459

460 **Fig.S7. Monovalent and trivalent vaccines induce circulating CD8<sup>+</sup> T cell immune responses**

461 **in the lungs.** The CD8<sup>+</sup>CD69<sup>+</sup> T cells in the lungs were stimulated WA1 S peptide or

462 PMA/Ionomycin. The percent and number of S-specific CD45<sup>+</sup>CD8<sup>+</sup>CD44<sup>+</sup>CD62L<sup>-</sup>CD69<sup>+</sup> T cells

463 (A and B), IFN $\gamma$ <sup>+</sup>-producing CD8<sup>+</sup> T cells (C and D), and the percent and number of

464 PMA/Ionomycin-stimulated-specific CD45<sup>+</sup>CD8<sup>+</sup>CD44<sup>+</sup>CD62L<sup>-</sup>CD69<sup>+</sup> T cells (E and F), IFN $\gamma$ <sup>+</sup>-

465 producing CD8<sup>+</sup> T cells (G and H) are shown. One-way ANOVA with Tukey's multiple

466 comparisons was used to detect differences among groups (\* $P < 0.05$ ; \*\*\*\* $P < 0.0001$ ).

467

468

469

470

471

472

473

474

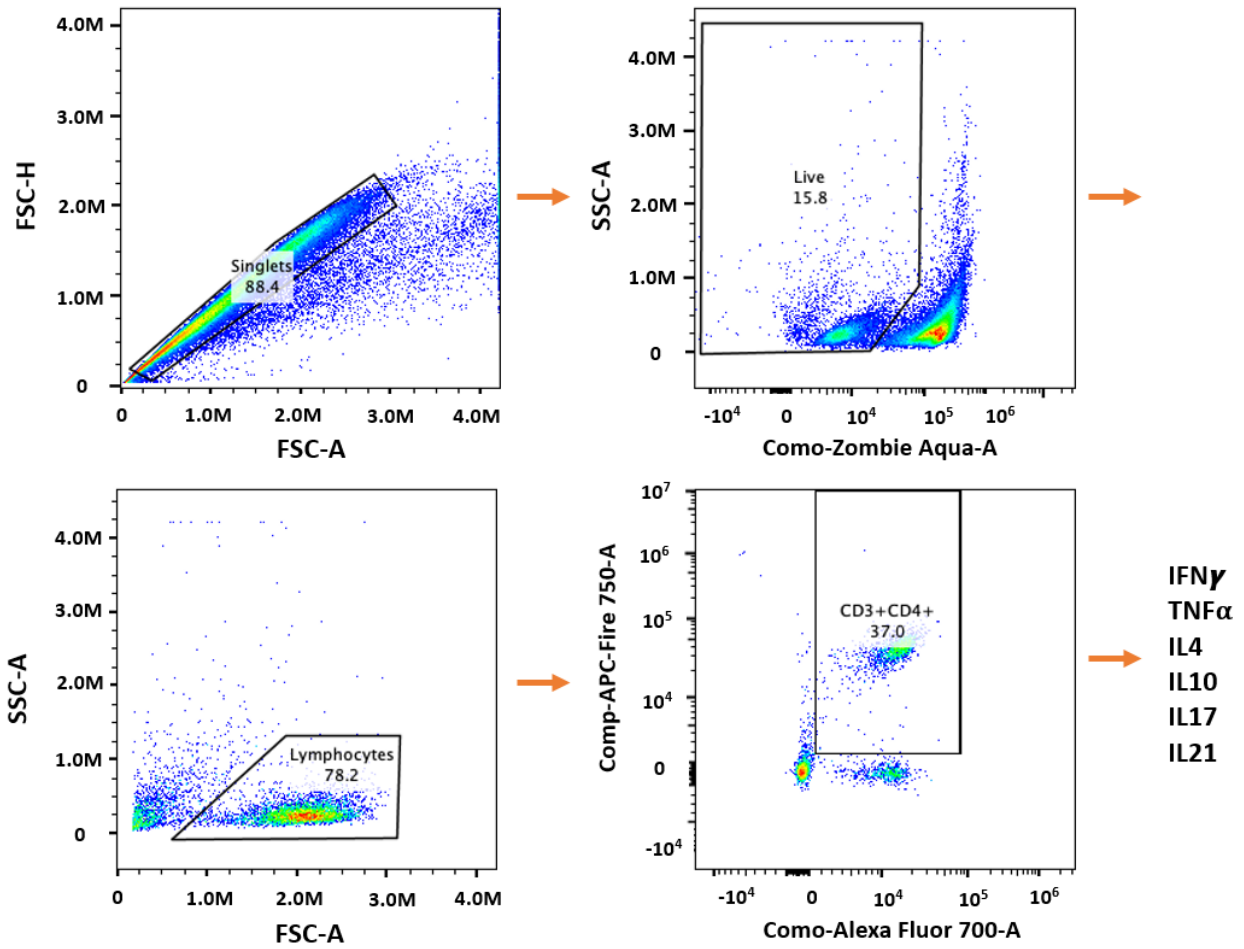

475

476

477 **Fig.S8. Gating strategy for characterization of antigen-specific T cells producing cytokines**  
478 **in spleen cells after stimulation with S-specific peptide in intracellular cytokine staining**  
479 **(ICS) assay.**

480

481

482

483

484

485

486

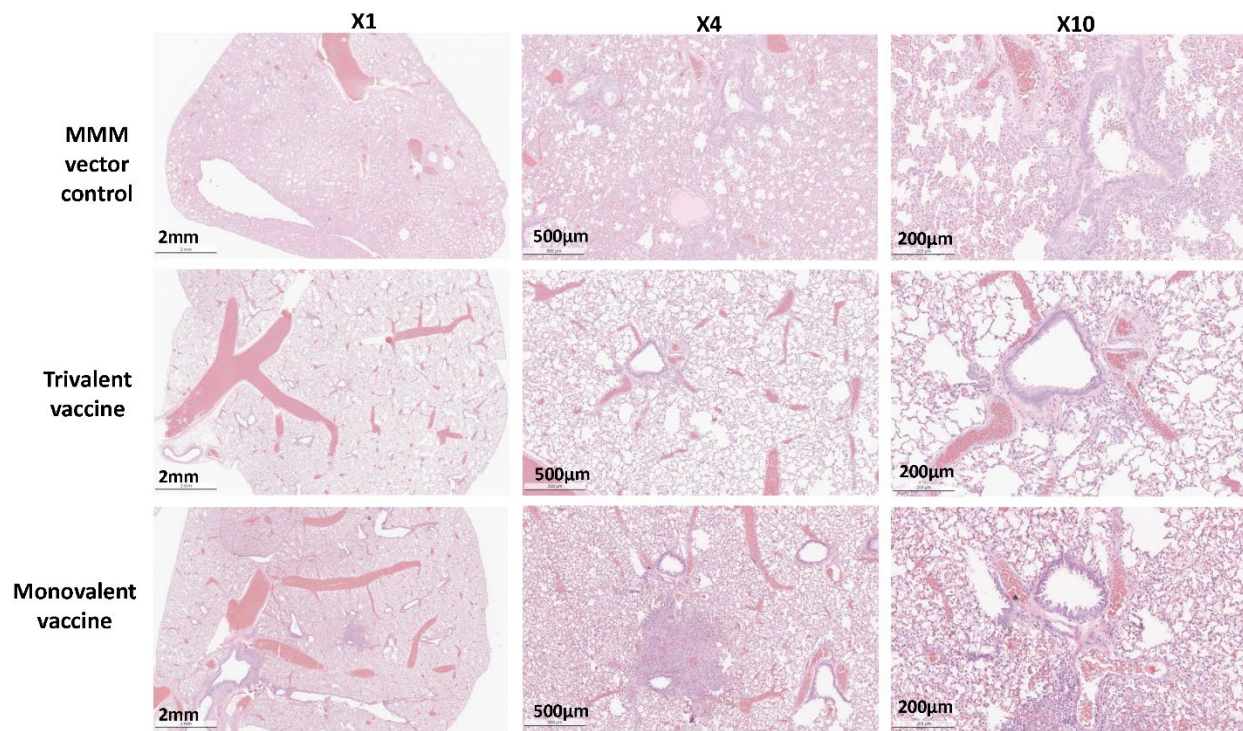

487

488

489 **Fig.S9. Monovalent and trivalent immunization protects against lung pathology.** Hamsters  
490 were euthanized at day 4 after SARS-CoV-2 WA1 challenge. Lung tissue was stained with  
491 hematoxylin/eosin. Micrographs with 1×, 4×, and 10× magnification of a representative lung  
492 section from each group are shown. Scale bars are indicated at the left corner of each image.

493

494

495

496

497

498

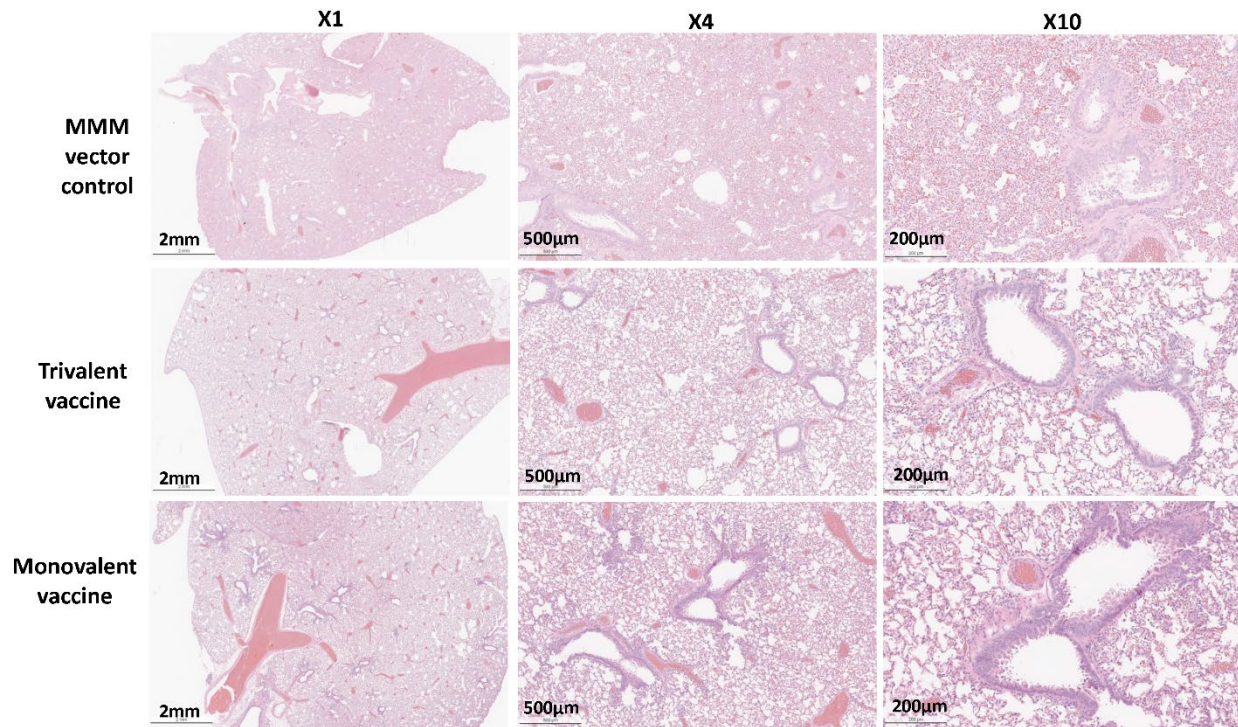

500

501

502

503 **Fig.S10. Monovalent and trivalent immunization protects against lung pathology.** Hamsters

504 were euthanized at day 4 after SARS-CoV-2 Delta variant challenge. Lung tissue was stained with

505 Hematoxylin/eosin. Micrographs with 1×, 4×, and 10× magnification of a representative lung

506 section from each group are shown. Scale bars are indicated at the left corner of each image.

507

508

509

510

511

512

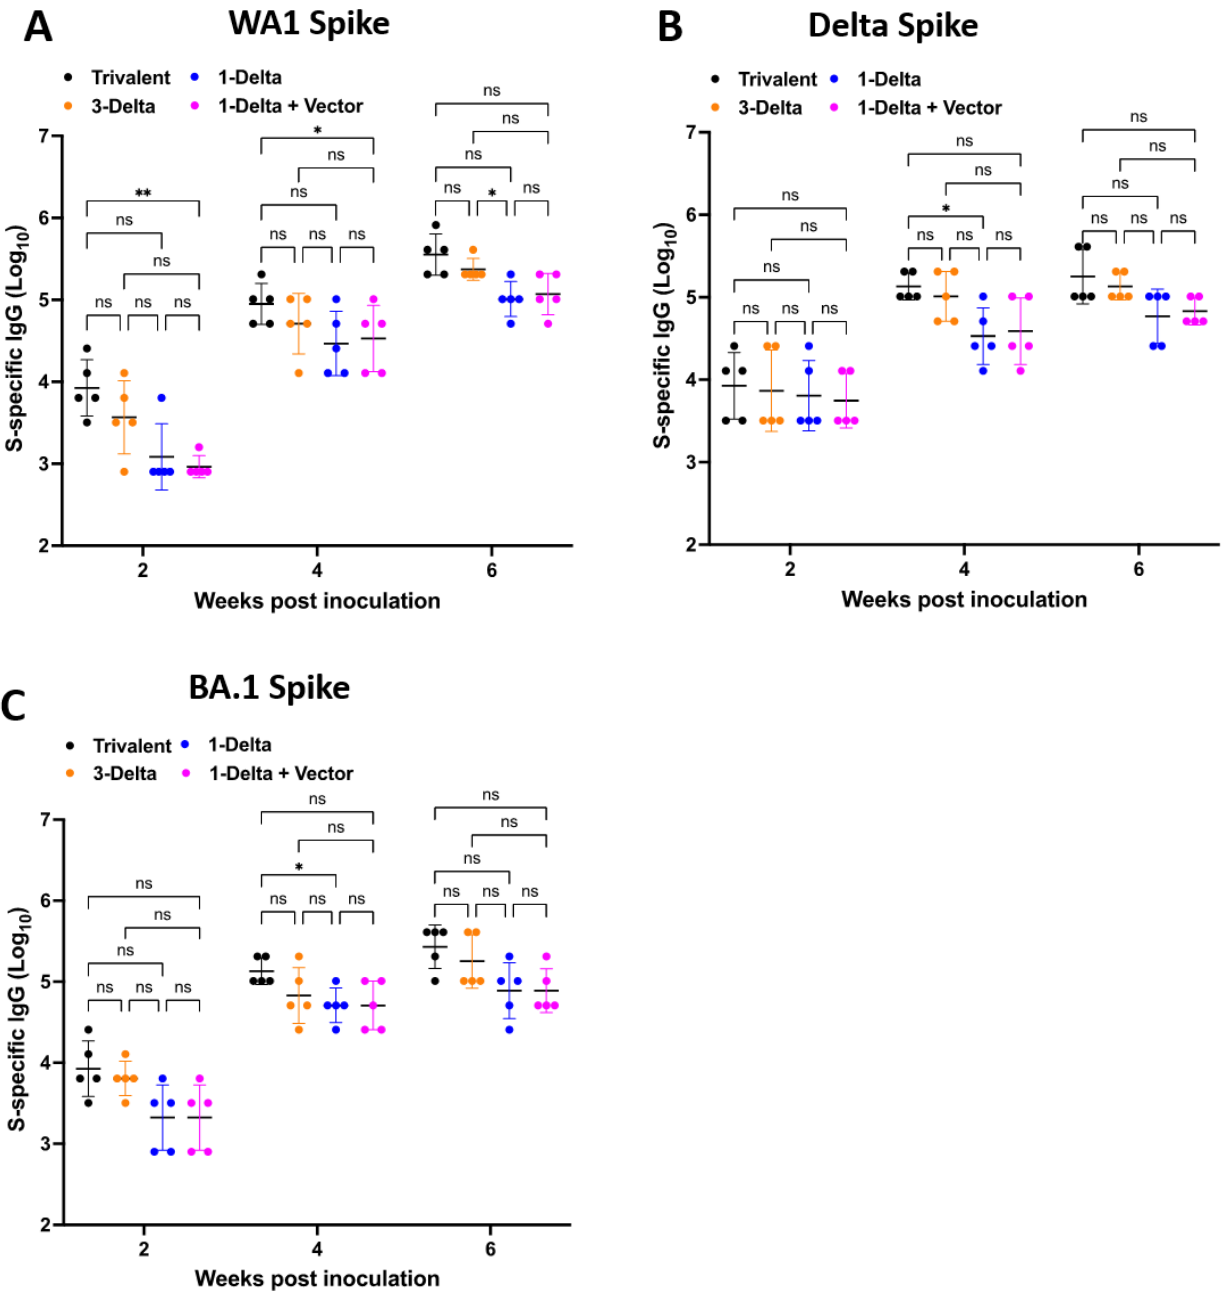

513

514

515

516

517

518

519

- Trivalent: a mixture of  $5 \times 10^5$  PFU of rMuV-JL1-Delta-preS-6P,  $5 \times 10^5$  PFU of rMuV-JL2-WA1-preS-6P, and  $5 \times 10^5$  PFU of rMeV-BA.1-preS-6P
- 3-Delta:  $1.5 \times 10^6$  PFU of rMuV-JL1-Delta-preS-6P
- 1-Delta:  $5 \times 10^5$  PFU of rMuV-JL1-Delta-preS-6P
- 1-Delta+Vector: a mixture of  $5 \times 10^5$  PFU of rMuV-JL1-Delta-preS-6P,  $5 \times 10^5$  PFU of rMuV-JL2, and  $5 \times 10^5$  PFU of rMeV

**Fig.S11. rMeV and rMuV vectors do not interfere with the S-specific antibody induced by**

520 **rMuV-JL1-Delta-preS-6P.** IFNAR1<sup>-/-</sup> mice were intranasally immunized with 1.5×10<sup>6</sup> PFU of  
521 trivalent vaccine (5×10<sup>5</sup> PFU of rMuV-JL1-Delta-preS-6P, rMuV-JL2-WA1-preS-6P, and rMeV-  
522 BA.1-preS-6P), 1.5×10<sup>6</sup> PFU of rMuV-JL1-Delta-preS-6P, 5×10<sup>5</sup> PFU of rMuV-JL1-Delta-preS-  
523 6P, or 1.5×10<sup>6</sup> PFU of rMuV-JL1-Delta-preS-6P+Vector (5×10<sup>5</sup> PFU of rMuV-JL1-Delta-preS-6P,  
524 rMuV-JL2, and rMeV). At week 3, each group was boosted with the same vaccine at the same  
525 dose. At weeks 2, 4, and 6, serum was collected from each mouse for detection of IgG antibody  
526 by ELISA using preS-6P of SARS-CoV-2 WA1 (A), Delta variant (B), or Omicron BA.1 (C) as  
527 the coating antigen. Data shown are the GMT of five mice ± SD. Data were analyzed using two-  
528 way ANOVA (\**P* < 0.05; \*\**P* < 0.01; \*\*\**P* < 0.001; \*\*\*\**P* < 0.0001).

529

530

531

532

533

534

535

536

537

538

539

540

541

542

## Additional Discussion

543  
544  
545  
546  
547  
548  
549  
550  
551  
552  
553  
554  
555  
556  
557  
558  
559  
560  
561  
562  
563  
564  
565

MMR vaccine is one of the most successful vaccines in human history, inducing life-long protection. This combination virus vaccine has been used in infants and children since 1971, but the component vaccines were approved in 1963 (MeV), 1967 (MuV), and 1969 (rubella). Both MeV and MuV are excellent vaccine vectors. Using reverse genetics, a foreign gene can be inserted into the genome of MeV or MuV as an additional transcription unit. Recombinant virus expressing that foreign protein can induce strong systemic immune responses. The MMR vaccine contains four attenuated virus strains, MeV, MuV-JL1, MuV-JL2, and rubella virus. Therefore, three viruses (MeV, MuV-JL1, and MuV-JL2) in the MMR vaccine could be modified to express a different antigen as components of a trivalent vaccine candidate. Our MMS vaccine is a multivalent COVID-19 vaccine containing three optimized preS-6P proteins (one preS-6P from the original SARS-CoV-2 strain and two preS-6P from recently identified Delta and Omicron BA.1 VoCs) which are incorporated into MuV-JL2, MuV-JL1, and MeV, respectively.

**preS-6P-based antigen is more immunogenic than preS-2P-based antigen.** We have demonstrated that preS-6P is significantly more immunogenic than preS-2P in three non-segmented negative sense (NNS) RNA viral vectors including MuV (11), MeV(3), vesicular stomatitis virus (VSV)(12). For example, sera raised by rMeV-preS-6P and rMuV-preS-6P had 6 and 8.5-fold more neutralizing antibody compared to rMeV-preS-2P and rMuV-preS-2P, respectively (3, 11). Antibodies induced by rVSV-preS-6P neutralized SARS-CoV-2 VoCs 2-4-fold more efficiently than those induced by rVSV-preS-2P (12). These studies highlight the importance of using preS-6P in the next generation COVID-19 vaccine.

566

567 In March of 2021, Merck discontinued the development of rMeV-based COVID-19 vaccine (V591  
568 or TMV-083) which is a MeV Schwarz strain expressing the full-length S with 2 prolines (with  
569 deleted furin cleavage site and two mutations in the endoplasmic reticulum retrieval signal)  
570 inserted at the H-L gene junction in the genome (13, 14). It should be noted that our rMeV-preS-  
571 2P reported previously (4) and rMeV-preS-6P reported here are different from V591 (13, 14) and  
572 MV-ATU2-SF-2P-dER (15). The preS-2P and preS-6P that we used have a deletion in the furin  
573 cleavage site that prevents cleavage and its TM/CT domains are replaced by a foldon domain to  
574 further stabilize the protein and enable it to be secreted (1, 16). Given the fact that the preS-6P-  
575 based vaccine constructs are much more immunogenic than the preS-2P-based vaccine candidate,  
576 the immunogenicity protective capabilities of rMeV-preS-6P should be tested clinically.

577

578 **Intranasal delivery of MMS vaccine and mucosal immunity.** We found that intranasal delivery  
579 of MMS vaccine is superior to subcutaneous immunization at inducing higher serum IgG and  
580 SARS-CoV-2-specific IgA enriched at mucosal surfaces that are sampled in BAL. In contrast,  
581 subcutaneous immunization does not induce any detectable IgA in the blood or lungs. In addition,  
582 we showed that intranasal immunization of MMS vaccine alone induced a strong systemic and  
583 mucosal immune response and provided complete protection against challenge with the ancestral  
584 SARS-CoV-2 WA1, Delta variant, and Omicron BA.1 variant. Secretory IgA (sIgA) at the mucosal  
585 surface plays a critical role in immune defense by enabling neutrophils to undergo NETosis which  
586 traps and kills virus, thereby limiting spread (17, 18). In addition, sIgA provides superior protection  
587 against both homologous and heterologous virus infection than circulating IgG antibodies alone  
588 (17, 18). Thus, such a next-generation COVID-19 should induce strong serum and mucosal



589 antibodies which are essential for preventing SARS-CoV-2 infection and transmission.

590

591 Another advantage of using an intranasal vaccine is the ability to induce  $T_{RM}$ , that significantly  
592 accelerate the recognition and clearance of pathogens previously encountered at that site. We  
593 showed that intranasal delivery of monovalent and trivalent vaccines induce lung  $T_{RM}$  cells, the  
594 hallmark of an effective mucosal respiratory vaccine. Both the monovalent and trivalent vaccines  
595 induced  $CD4^+Th1$  (IFN- $\gamma$ ),  $CD4^+Th17$  (IL17), and  $CD8^+ T$  (IFN- $\gamma$ ) cells, but rarely  $CD4^+Th2$  (IL-  
596 5) cells. Our previous animal immunization experiments using rMuV-preS-6P demonstrated that  
597 intranasal but not subcutaneous immunization induces SARS-CoV-2-specific lung  $T_{RM}$  cells (11).  
598 The superior ability of  $T_{RM}$  cells to provide antiviral protection probably results from their ability  
599 to immediately respond to invading pathogens owing to their location, either through cell-intrinsic  
600 protective mechanisms (cytolysis, cytokine secretion) or by recruiting circulating cell subsets  
601 (chemokine induction) (19). In a naturally infected individual, SARS-CoV-2-specific memory T  
602 and B cells are localized preferentially to lung and lung-associated lymph nodes, providing direct  
603 evidence that those sites are key locations for establishing immune memory after SARS-CoV-2  
604 infection (20). The IFN- $\gamma$ -producing  $CD4^+$  and  $CD8^+$   $T_{RM}$  cells have been shown to broadly  
605 enhance tissue-wide antiviral responses such as the upregulation of type I IFN signaling pathway  
606 factors and enhanced leukocyte recruitment to the site of infection (21).

607

608 CDC and FDA recommend MMR vaccine be administered subcutaneously or intramuscularly.  
609 However, several human trials demonstrated that intranasal delivery of MeV and MuV are safe  
610 and highly efficacious. Human clinical trials involving 2,887 individuals showed that aerosolized  
611 MeV vaccine (MeV Edmonston-Zagreb and Schwarz strains) was safe and more immunogenic

612 than subcutaneous vaccine (22, 23). In 1997, nearly 4 million schoolchildren in Mexico were  
613 immunized intranasally with MeV vaccine with high apparent effectiveness and safety (22). In  
614 non-human primates, intranasal immunization of MeV vaccine led to MeV replication in the  
615 muscle, nasal tissues, lungs, and draining lymph nodes which elicited optimal immunity and  
616 protection (24). Similarly, intranasal vaccination of the MuV L-3 vaccine strain induced higher  
617 MuV-neutralizing antibody titers in human volunteers than other immunization routes (25) .

618

619 **Non-segmented negative-sense (NNS) RNA viruses as vectors to deliver SARS-CoV-2**  
620 **vaccines.** NNS RNA viruses have strong potential to be used as vectors for development of the  
621 next generation vaccine for SARS-CoV-2. Many NNS RNA viruses such as pneumoviruses (e.g.  
622 human respiratory syncytial virus, RSV), human paramyxoviruses [e.g. MeV, MuV, human  
623 parainfluenza virus 3 (PIV3)] or animal paramyxoviruses (parainfluenza virus 5, PIV5; Newcastle  
624 disease virus, NDV; avian paramyxovirus type 3, APMV3) are natural respiratory viruses which  
625 can be developed as intranasal vectored vaccines. Among them, a phase I clinical trial of an NDV-  
626 preS-6P-based COVID-19 vaccine candidate (NDV-HXP-S) has a high safety and immunogenicity  
627 profile (26, 27). In addition, RSV-S (replacement of RSV glycoproteins with native full-length S)  
628 (28) and PIV5-S (PIV5 expressing native full-length S)-based COVID-19 vaccine candidates (29)  
629 are currently being evaluated as intranasal vaccines in human clinical trials.

630

631

632

633

### References

- 634 1. C. L. Hsieh *et al.*, Structure-based design of prefusion-stabilized SARS-CoV-2 spikes.  
635 *Science* **369**, 1501-+ (2020).
- 636 2. Y. Zhang *et al.*, A highly efficacious live attenuated mumps virus-based SARS-CoV-2  
637 vaccine candidate expressing a six-proline stabilized prefusion spike. *P Natl Acad Sci USA*  
638 **119** (2022).
- 639 3. Y. Zhang *et al.*, Recombinant measles virus expressing prefusion spike protein stabilized  
640 by six rather than two prolines is more efficacious against SARS-CoV-2 infection. *J Med*

- 641 *Virology* 10.1002/jmv.28687 (2023).
- 642 4. M. J. Lu *et al.*, A safe and highly efficacious measles virus-based vaccine expressing  
643 SARS-CoV-2 stabilized prefusion spike. *Proc Natl Acad Sci USA* **118** (2021).
- 644 5. T. R. Fuerst, E. G. Niles, F. W. Studier, B. Moss, Eukaryotic Transient-Expression System  
645 Based on Recombinant Vaccinia Virus That Synthesizes Bacteriophage-T7 Rna-  
646 Polymerase. *Proc Natl Acad Sci USA* **83**, 8122-8126 (1986).
- 647 6. C. Zeng *et al.*, Neutralizing antibody against SARS-CoV-2 spike in COVID-19 patients,  
648 health care workers, and convalescent plasma donors. *Jci Insight* **5** (2020).
- 649 7. J. P. Evans *et al.*, Neutralization of SARS-CoV-2 Omicron sub-lineages BA.1, BA.1.1, and  
650 BA.2. *Cell Host Microbe* **30**, 1093-1102 e1093 (2022).
- 651 8. P. Qu *et al.*, Neutralization of the SARS-CoV-2 Omicron BA.4/5 and BA.2.12.1  
652 Subvariants. *New Engl J Med* **386**, 2526-+ (2022).
- 653 9. W. Su *et al.*, Reduced Pathogenicity and Transmission Potential of Omicron BA.1 and  
654 BA.2 Sublineages Compared with the Early Severe Acute Respiratory Syndrome  
655 Coronavirus 2 D614G Variant in Syrian Hamsters. *J Infect Dis* **227**, 1143-1152 (2023).
- 656 10. K. G. Anderson *et al.*, Intravascular staining for discrimination of vascular and tissue  
657 leukocytes. *Nat Protoc* **9**, 209-222 (2014).
- 658 11. Y. Zhang *et al.*, A highly efficacious live attenuated mumps virus-based SARS-CoV-2  
659 vaccine candidate expressing a six-proline stabilized prefusion spike. *Proc Natl Acad Sci*  
660 *USA* **119**, e2201616119 (2022).
- 661 12. M. Lu *et al.*, SARS-CoV-2 prefusion spike protein stabilized by six rather than two prolines  
662 is more potent for inducing antibodies that neutralize viral variants of concern. *Proc Natl*  
663 *Acad Sci USA* **119**, e2110105119 (2022).
- 664 13. O. Launay *et al.*, Safety and immunogenicity of a measles-vectored SARS-CoV-2 vaccine  
665 candidate, V591 / TMV-083, in healthy adults: results of a randomized, placebo-controlled  
666 Phase I study. *Ebiomedicine* **75** (2022).
- 667 14. F. Vanhoutte *et al.*, Safety and immunogenicity of the measles vector-based SARS-CoV-2  
668 vaccine candidate, V591, in adults: results from a phase 1/2 randomised, double-blind,  
669 placebo-controlled, dose-ranging trial. *Ebiomedicine* **75** (2022).
- 670 15. P. N. Frantz *et al.*, A live measles-vectored COVID-19 vaccine induces strong immunity  
671 and protection from SARS-CoV-2 challenge in mice and hamsters. *Nat Commun* **12** (2021).
- 672 16. D. Wrapp *et al.*, Cryo-EM structure of the 2019-nCoV spike in the prefusion conformation.  
673 *Science* **367**, 1260-+ (2020).
- 674 17. H. D. Stacey *et al.*, IgA potentiates NETosis in response to viral infection. *Proc Natl Acad Sci*  
675 *USA* **118** (2021).
- 676 18. Y. H. Jang *et al.*, Cold-adapted pandemic 2009 H1N1 influenza virus live vaccine elicits  
677 cross-reactive immune responses against seasonal and H5 influenza A viruses. *J Virol* **86**,  
678 5953-5958 (2012).
- 679 19. L. Chen, B. Wei, D. L. Di, A narrative review of tissue-resident memory T cells and their  
680 role in immune surveillance and COVID-19. *Eur Rev Med Pharmacol* **26**, 4486-4496  
681 (2022).
- 682 20. M. M. L. Poon *et al.*, SARS-CoV-2 infection generates tissue-localized immunological  
683 memory in humans. *Sci Immunol* **6** (2021).
- 684 21. S. L. Urban *et al.*, Peripherally induced brain tissue-resident memory CD8(+)T cells  
685 mediate protection against CNS infection. *Nat Immunol* **21**, 938-+ (2020).
- 686 22. N. Low, S. Kraemer, M. Schneider, A. M. H. Restrepo, Immunogenicity and safety of

- 687 aerosolized measles vaccine: Systematic review and meta-analysis. *Vaccine* **26**, 383-398  
688 (2008).
- 689 23. J. V. Bennett *et al.*, Aerosolized measles and measles-rubella vaccines induce better  
690 measles antibody booster responses than injected vaccines: randomized trials in Mexican  
691 schoolchildren. *B World Health Organ* **80**, 806-812 (2002).
- 692 24. R. L. de Swart *et al.*, Needle-free delivery of measles virus vaccine to the lower respiratory  
693 tract of non-human primates elicits optimal immunity and protection. *Npj Vaccines* **2**  
694 (2017).
- 695 25. V. P. Krasnova, N. V. Iuminova, V. A. Liashenko, [An intranasal method of revaccination  
696 against mumps]. *Vopr Virusol* **39**, 24-26 (1994).
- 697 26. P. Pitisuttithum *et al.*, Safety and immunogenicity of an inactivated recombinant Newcastle  
698 disease virus vaccine expressing SARS-CoV-2 spike: Interim results of a randomised,  
699 placebo-controlled, phase 1 trial. *Eclinicalmedicine* **45** (2022).
- 700 27. A. D. Dang *et al.*, Safety and immunogenicity of an egg-based inactivated Newcastle  
701 disease virus vaccine expressing SARS-CoV-2 spike: Interim results of a randomized,  
702 placebo-controlled, phase 1/2 trial in Vietnam. *Vaccine* **40**, 3621-3632 (2022).
- 703 28. M. F. Tioni *et al.*, Mucosal administration of a live attenuated recombinant COVID-19  
704 vaccine protects nonhuman primates from SARS-CoV-2. *Npj Vaccines* **7** (2022).
- 705 29. D. An *et al.*, Protection of K18-hACE2 mice and ferrets against SARS-CoV-2 challenge  
706 by a single-dose mucosal immunization with a parainfluenza virus 5-based COVID-19  
707 vaccine. *Sci Adv* **7** (2021).
- 708
